# Supplementary material
Source: PubMed Central journal article supplement (PMC7536762)
Supplement: CJN.04650420SupplementaryData.pdf [file CJN.04650420SupplementaryData.pdf]

Supplemental Table 1. Characteristics of patients with AKI according to the time of AKI occurrence

|                                              | Within 7 days (N=40) |               | More than 7 days (N=59) |               |
|----------------------------------------------|----------------------|---------------|-------------------------|---------------|
|                                              | No.                  | Summary       | No.                     | Summary       |
| <b>Clinical characteristics</b>              |                      |               |                         |               |
| Age, years                                   | 40                   | 66 (57-73)    | 59                      | 67 (61-78)    |
| Male patients, No (%)                        | 40                   | 32 (80)       | 59                      | 35 (59)       |
| Fever on admission, No (%)                   | 34                   | 14 (41)       | 47                      | 9 (19)        |
| Systolic blood pressure, mmHg                | 38                   | 137 (124-149) | 55                      | 134 (118-146) |
| Diastolic blood pressure, mmHg               | 38                   | 82 (73-91)    | 55                      | 80 (74-87)    |
| Severe disease, No (%)                       | 40                   | 29 (73)       | 59                      | 40 (68)       |
| Smoking, No (%)                              | 40                   | 4 (10)        | 59                      | 8 (14)        |
| Any comorbidity, No (%)                      | 40                   | 26 (65)       | 59                      | 30 (51)       |
| Chronic kidney disease, No (%)               | 40                   | 2 (5)         | 59                      | 2 (3)         |
| Chronic lung disease, No (%)                 | 40                   | 6 (15)        | 59                      | 5 (8)         |
| Diabetes, No (%)                             | 40                   | 7 (18)        | 59                      | 16 (27)       |
| Hypertension, No (%)                         | 40                   | 18 (45)       | 59                      | 22 (37)       |
| Tumor, No (%)                                | 40                   | 2 (5)         | 59                      | 3 (5)         |
| <b>Laboratory data</b>                       |                      |               |                         |               |
| Blood urea nitrogen, mg/dL                   | 40                   | 29 (16-55)    | 59                      | 19 (14-27)    |
| Serum creatinine, mg/dL                      | 40                   | 1.1 (0.8-1.6) | 59                      | 0.9 (0.7-1.1) |
| eGFR, ml/min/1.73m <sup>2</sup>              | 40                   | 71 (38-92)    | 59                      | 81 (70-93)    |
| eGFR < 60 ml/min/1.73m <sup>2</sup> , No (%) | 40                   | 18 (45)       | 59                      | 8 (14)        |
| Hematuria                                    | 17                   | 5 (29)        | 26                      | 11 (42)       |
| 1+                                           | 17                   | 5 (29)        | 26                      | 9 (35)        |
| 2+~3+                                        | 17                   | 7 (41)        | 26                      | 6 (23)        |
| Proteinuria                                  | 17                   | 2 (12)        | 26                      | 4 (15)        |
| 1+                                           | 17                   | 9 (53)        | 26                      | 19 (73)       |
| 2+~3+                                        | 17                   | 6 (35)        | 26                      | 3 (12)        |
| Lymphopenia, No (%)                          | 40                   | 34 (85)       | 59                      | 47 (80)       |
| Anemia, No (%)                               | 40                   | 22 (55)       | 59                      | 25 (42)       |
| D-dimer > 0.5 mg/L, No (%)                   | 39                   | 37 (95)       | 57                      | 53 (93)       |
| hs-CRP ≥ 10mg/L, No (%)                      | 39                   | 38 (97)       | 57                      | 52 (91)       |
| LDH > 245U/L, No (%)                         | 40                   | 36 (90)       | 59                      | 49 (83)       |
| <b>Outcomes</b>                              |                      |               |                         |               |
| Intensive care unit, %                       | 40                   | 31 (78)       | 59                      | 45 (76)       |
| Mechanical ventilation, %                    | 40                   | 32 (80)       | 59                      | 48 (81)       |
| Non-invasive, No (%)                         | 40                   | 24 (60)       | 59                      | 44 (75)       |
| Invasive, No (%)                             | 40                   | 24 (60)       | 59                      | 37 (63)       |
| Vasopressor, No (%)                          | 40                   | 33 (83)       | 59                      | 42 (72)       |
| ECMO, No (%)                                 | 40                   | 1 (3)         | 59                      | 5 (8)         |
| Hospital length of stay, days                | 40                   | 9 (5-13)      | 59                      | 24 (18-38)    |
| In-hospital mortality, No (%)                | 40                   | 33 (83)       | 59                      | 38 (64)       |

Clinical characteristics and laboratory data were assessed on admission. Values for categorical variables are given as count (percentage); values for continuous variables are given as median (interquartile range). AKI, acute kidney

injury; eGFR, estimated glomerular filtration rate; hs-CRP, high-sensitivity c-reactive protein; LDH, lactose dehydrogenase. Severe disease was defined as either: (i) respiratory rate  $> 30/\text{min}$ , or (ii) oxygen saturation  $\leq 93\%$ , or (iii) PaO<sub>2</sub>/FiO<sub>2</sub> ratio  $\leq 300\text{mmHg}$ . Lymphopenia is defined as lymphocyte count less than  $1.0 \times 10^9/\text{L}$ . Anemia is defined as hemoglobin level of less than 13 g/dL in men and as hemoglobin of less than 12 g/dL in women.
